# Supplementary material
Source: MDPI journal article supplement (https://www.mdpi.com/2073-431X/10/10/134)
Supplement: s1 [file s1]

## Supplementary Material S1

### *To the article “Ready Teacher One: Virtual and Augmented Reality Online Professional Development for K-12 School Teachers”*

**Table S1.** Complete List of 44 Materials and 20 Activities of the Online Teacher Professional Development Program “The AR and VR in Education”

#### **Module 1 - AR and VR in Education**

1. Activity 1.1: Diagnostic Assessment (individual activity)
2. Activity 1.2: SWOT Analysis (open, cooperative activity)
3. Activity 1.3: Inaugural Online Meeting
4. Activity 1.4: Deep-dive into XR (individual study)
5. Activity 1.5: Extended Knowledge Oasis (self-assessment quiz)
6. Video lecture 1.1: Immersive technologies – Extended Reality (XR)
7. Video lecture 1.2: Introduction into Virtual Reality (VR)
8. Video lecture 1.3: VR Technological Applications
9. Video lecture 1.4: Pedagogical Applications of VR in Education
10. Video lecture 1.5: Introduction into Augmented Reality (AR)
11. Video lecture 1.6: AR Technological Applications
12. Video lecture 1.7: Pedagogical Applications of AR in Education
13. Video lecture 1.8: Similarities and Differences between AR and VR
14. Video lecture 1.9: VR Restrictions
15. Study Material 1.1: A Museum of Virtual Media<sup>1</sup>
16. Study Material 1.2: HTC Vive Look To Recreate Ready Player One’s The Oasis In VR<sup>2</sup>
17. Study Material 1.3: Introduction into Virtual Reality (Greek)
18. Study Material 1.4: Virtual Environments (Greek)
19. Attachment 1.1: AR / VR Glossary
20. Attachment 1.2: Good AR / VR Practices in Education
21. Attachment 1.3: Comparative Table of AR / VR Tools & Platforms
22. Material for further study

---

<sup>1</sup> <http://www.naturalhistorymag.com/features/102133/a-museum-of-virtual-media>

<sup>2</sup> <https://www.vrfocus.com/2018/10/htc-vive-look-to-recreate-ready-player-ones-the-oasis-in-vr/>

## **Module 2 - Digital storytelling with AR**

1. Activity 2.1: Deep-dive into AR (individual study)
2. Activity 2.2: Augmented Knowledge Oasis (self-assessment quiz)
3. Activity 2.3: We and AR (asynchronous discussion)
4. Activity 2.4: Augment your Teaching! (individual practice)
5. Activity 2.5: AR Online Workshop
6. Video lecture 2.1: Introduction in Digital Storytelling
7. Video lecture 2.2: Digital Storytelling in Education
8. Video lecture 2.3: Digital Storytelling with AR
9. Video lecture 2.4: Introduction into Google Expeditions
10. Study Material 2.1: Hyper-Reality as a new future perspective?<sup>3</sup>
11. Study Material 2.2: Augmented Reality (Greek)
12. Study Material 2.3: Design and implementation of an online learning environment with AR (Greek)
13. Study Material 2.4 Blippar Instructions & User Guide (Greek)
14. Attachment 2.1: Storyboard Template
15. Attachment 2.2: Table of Digital Storytelling Tools
16. Attachment 2.3: AR Expeditions List
17. Material for further study

## **Module 3 - Inquiry-based learning with VR**

1. Activity 3.1: Deep-dive into VR (individual study)
2. Activity 3.2: Virtual Knowledge Oasis (self-assessment quiz)
3. Activity 3.3: We and VR (asynchronous discussion)
4. Activity 3.4: Virtualize your Teaching! (individual practice)
5. Activity 3.5: VR Online Workshop
6. Video lecture 3.1a: Inquiry-based Learning
7. Video lecture 3.1b: VR with Google Expeditions
8. Video lecture 3.2: Pedagogical Applications of Spherical (360) VR Videos in Education
9. Video lecture 3.3: Social Virtual Reality and Virtual Worlds
10. Video lecture 3.4: Pedagogical Applications of Social VR in Education

---

<sup>3</sup> <https://youtu.be/YJg02ivYzSs>

11. Video lecture 3.5: Game-based Learning in Social VR
12. Video lecture 3.6: Technological Applications and Restrictions of Social VR
13. Study Material 3.1: Will Virtual Reality Drive Deeper Learning?<sup>4</sup>
14. Study Material 3.2: Virtual Worlds (Greek)
15. Study Material 3.3: Social virtual reality environments<sup>5</sup>
16. Study Material 3.4: Inquiry-based Learning<sup>6</sup>
17. Material for further study

#### **Module 4 – Educational Scenario Design, Application, and Research**

1. Activity 4.1: Deep-dive into Educational Scenario Design (individual study)
2. Activity 4.2: Innovative Lesson Plan Design (open, peer-assessment activity)
3. Activity 4.3: Class Application and Research Project (individual assignment)
4. Activity 4.4: We and Immersive Technologies (asynchronous reflection)
5. Activity 4.5: Final Online Meeting
6. Video lecture 4.1: Introduction into Educational Scenario Design
7. Attachment 4.1: Inquiry-based Learning Scenario with VR environments Instructions
8. Attachment 4.2: Digital Storytelling Scenario with AR environments Instructions
9. Material for further study

---

<sup>4</sup> <https://www.edutopia.org/article/virtual-reality-drive-deeper-learning-holly-korbey>

<sup>5</sup> Mystakidis, S. (2019). Social virtual reality environments. In *Motivation Enhanced Deep and Meaningful Learning with Social Virtual Reality* (pp. 31–34). University of Jyväskylä. <https://jyx.jyu.fi/handle/123456789/66667>

<sup>6</sup> <https://www.moorabbin.vic.edu.au/inquiry-based-learning>

## Ιστορική Αναδρομή

### Η Ιστορία της Εικονικής Πραγματικότητας 2/2

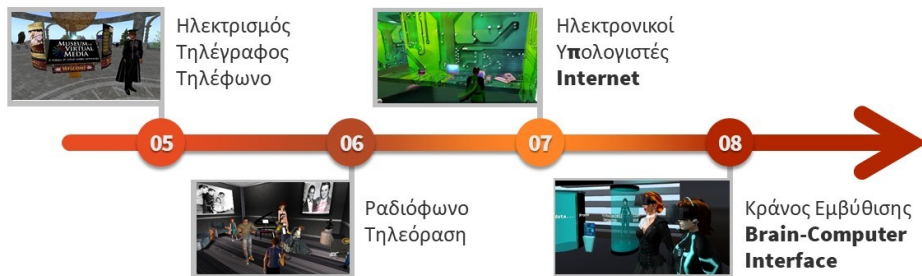

5

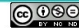

Figure S1. Slide (VR Timeline) from Video Lecture 1.2 “Introduction into Virtual Reality (VR)”.

## Σύνοψη

### Βήματα ψηφιακής αφήγησης

- ✓ Τι πρέπει να ακολουθήσετε να για να δημιουργήσετε μία ψηφιακή αφήγηση;

### Τρόπος δημιουργίας Ψηφιακής Αφήγησης

- ✓ Με ποιους τρόπους θα ξεκινήσετε και θα ολοκληρώσετε την ψηφιακή σας αφήγηση ώστε να πετύχετε τους στόχους σας;

### Εργαλεία δημιουργίας ψηφιακής αφήγησης

- ✓ Ποια ενδεικτικά εργαλεία υπάρχουν ώστε να χρησιμοποιήσετε για τη δημιουργία ψηφιακής αφήγησης;

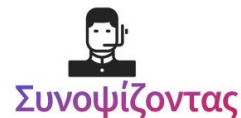

Σε αυτή την παρουσίαση συστηματοποιήσατε τις γνώσεις σας σε σχέση με:

24

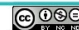

Figure S2. Final Slide (Summary) from Video Lecture 2.2 “Digital Storytelling in Education”.

# 1. Συνεργατική Μάθηση

- Εικονικές Ομάδες
- Ταυτόχρονη επεξεργασία 3D & 2D αντικειμένων (Συνδημιουργία)
- Διαδραστική Ψηφοφορία
- Συνεργατικές Δραστηριότητες

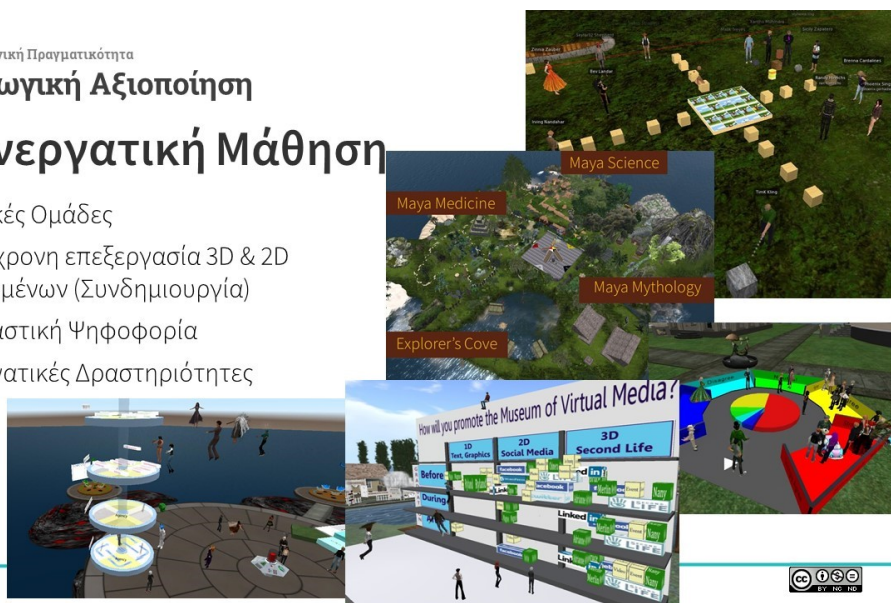

Figure S3. Slide (Collaborative Learning) from Video Lecture 3.4 “Pedagogical Applications of Social VR in Education”.

| Καλές Πρακτικές AR VR στην Εκπαίδευση |                       |                                                                                                                                            |                    |               |                            |                                |                    |                                            |                                                                                                                                       |                                                 |
|---------------------------------------|-----------------------|--------------------------------------------------------------------------------------------------------------------------------------------|--------------------|---------------|----------------------------|--------------------------------|--------------------|--------------------------------------------|---------------------------------------------------------------------------------------------------------------------------------------|-------------------------------------------------|
| Reference                             | Είδος υλικού          | Τίτλος                                                                                                                                     | Τεχνολογία (AR/VR) | Χώρα          | Βαθμίδα                    | Γνωστικό αντικείμενο           | Ψηφιακό Εργαλείο   | Τι κάνουν οι μαθητές                       | Προσπόμενη αξία / Αποτέλεσμα / Όφελος                                                                                                 | Συνδέσμοι                                       |
| Hill & Mystakidis 2012                | paper, website, video | Maya Island virtual museum: A virtual learning environment, museum, and library exhibit                                                    | Desktop VR         | ΗΠΑ           | Δημοτικό, Γυμνάσιο, Λύκειο | Ιστορία, Πολιτισμός            | Second Life        | Εξερεύνηση, παιχνίδι                       | Δημιουργία 3D εικονικού μουσείου για αρχαίο πολιτισμό                                                                                 | <a href="https://www.slid">https://www.slid</a> |
| Innocenti et al., 2019                | paper                 | Mobile virtual reality for musical genre learning in primary education                                                                     | VR                 | Ιταλία        | Δημοτικό                   | Μουσική                        |                    | Συμμετοχή σε παιχνίδι                      | statistically significant improvement in learning genre characterization with VR compared to traditional lessons                      | <a href="https://www.sci">https://www.sci</a>   |
| Koutromanos et al., 2015              | paper                 | The use of augmented reality games in education: a review of the literature                                                                | AR                 | International | Ανασκόπηση                 |                                |                    |                                            |                                                                                                                                       | <a href="https://www.tan">https://www.tan</a>   |
| Mystakidis & Berkl 2018               | paper                 | The case of literacy motivation: Playful 3D immersive learning environments and problem-focused education for blended digital storytelling | Desktop VR         | Ελλάδα        | Δημοτικό, Γυμνάσιο, Λύκειο | Ιστορία, Φιλαναγνωσία          | Second Life        | Συμμετοχή σε παιχνίδι                      | Παιχνιδιοποίηση μάθησης μέσω ψηφιακής αφήγησης σε 3D εικονικά περιβάλλοντα                                                            | <a href="https://www.res">https://www.res</a>   |
| Mystakidis 2016                       | game                  | Monastery Raider: The Panagia Paramythia Code                                                                                              | Desktop VR         | UK            | Δημοτικό, Γυμνάσιο, Λύκειο | Θρησκευτικά                    | Kitely             | Εξερεύνηση, παιχνίδι                       | Δημιουργία 3D παιχνιδιού σοβαρού σκοπού                                                                                               |                                                 |
| Mystakidis et al. 2017a               | paper, ppt            | Designing and Implementing a Big Open Online Course by using a 3D Virtual Immersive Environment                                            | Desktop VR         | Ελλάδα        | Γυμνάσιο, Λύκειο           | Θεωρητικές Επιστήμες           | Second Life        | Συναντήσεις εξ αποστάσεως                  | Ανοικτή και εξ αποστάσεως εκπαίδευση σε 3D Εικονικούς Κόσμους, Εικονικές Περιηγήσεις                                                  | <a href="https://www.res">https://www.res</a>   |
| Mystakidis et al. 2017b               | paper                 | Toward successfully integrating Mini Learning Games into Social Virtual Reality Environments                                               | Desktop VR         | ΗΠΑ           | Γυμνάσιο, Λύκειο           | Θετικές Επιστήμες, Πληροφορική | Second Life        | Συμμετοχή σε παιχνίδι                      | Δημιουργία 3D παιχνιδιού σοβαρού σκοπού μέσω μεταφορών και απεικόνισης εννοιών                                                        | <a href="https://www.res">https://www.res</a>   |
| Mystakidis et al. 2019                | paper                 | Enter the Serious E-scape Room: A Cost-Effective Serious Game Model for Deep and Meaningful E-learning                                     | VR                 | ΗΠΑ           | Γυμνάσιο, Λύκειο           | Θετικές Επιστήμες, Βιολογία    | Amazon Sumerian    | Συμμετοχή σε παιχνίδι                      | Δημιουργία 3D παιχνιδιού σοβαρού σκοπού                                                                                               | <a href="https://www.res">https://www.res</a>   |
| Segura et al., 2019                   | paper                 | VR-OCKS: A virtual reality game for learning the basic concepts of programming                                                             | VR                 |               | Γυμνάσιο, Λύκειο           | Πληροφορική                    | HTC VIVE & Unity3d | Συμμετοχή σε παιχνίδι, επίλυση προβλημάτων | The use of the game strengthened the spatial orientation, autonomy, common sense, creative thinking and systematic reasoning of users | <a href="https://onlineib">https://onlineib</a> |

Figure S4. Snapshot from Attachment 1.2 “Good AR / VR Practices in Education”.

| Συγκριτικός Πίνακας Εργαλείων AR VR                                             |                         |               |                       |                                                                                                     |                                                  |             |                                          |                                                                                                   |                                                                                                                                                 |                                                                                                                                               |                                                 |  |
|---------------------------------------------------------------------------------|-------------------------|---------------|-----------------------|-----------------------------------------------------------------------------------------------------|--------------------------------------------------|-------------|------------------------------------------|---------------------------------------------------------------------------------------------------|-------------------------------------------------------------------------------------------------------------------------------------------------|-----------------------------------------------------------------------------------------------------------------------------------------------|-------------------------------------------------|--|
| File Edit View Insert Format Data Tools Add-ons Help All changes saved in Drive |                         |               |                       |                                                                                                     |                                                  |             |                                          |                                                                                                   |                                                                                                                                                 |                                                                                                                                               |                                                 |  |
| fx A B C D E F G H I J K L M                                                    |                         |               |                       |                                                                                                     |                                                  |             |                                          |                                                                                                   |                                                                                                                                                 |                                                                                                                                               |                                                 |  |
| 1                                                                               | Όνομα                   | Κατασκευαστής | Τεχνολογία            | Ιστοσελίδα                                                                                          | Τύπος λογισμικού                                 | Κόστος      | Υποστηρίξιμο να λειτουργούν Σύστημα      | App Link Android                                                                                  | App Link iOS                                                                                                                                    | Παρόνδραγμα Εφαρμογής (υπερσύνδεση)                                                                                                           | Παρατηρήσεις                                    |  |
| 2                                                                               | Actionbound             |               | QR/GPS                | <a href="https://en.actionbound.com/">https://en.actionbound.com/</a>                               | app software & free                              | free        | Android, IOS studio windows/ εφομνη/ app | <a href="https://play.google.com/store/apps/details?id=com.actionbound">https://play.g</a>        | <a href="https://apps.apple.com/app/actionbound">https://apps.apple.com/app/actionbound</a>                                                     | Create mobile adventures and interactive                                                                                                      |                                                 |  |
| 3                                                                               | Blippar                 |               | AR                    | <a href="https://www.blippar.com/">https://www.blippar.com/</a>                                     | app software & free/paid                         | free/paid   | studio windows/ εφομνη/ app HTC, Oculus  | <a href="https://play.google.com/store/apps/details?id=com.blippar">https://play.g</a>            | <a href="https://itunes.apple.com/gb/app/blippar/id10604563">https://itunes.apple.com/gb/app/blippar/id10604563</a>                             |                                                                                                                                               | Απατούνται headset                              |  |
| 4                                                                               | Blocks                  | Google        | VR/AR                 | <a href="https://arvr.google.com/experiences/learn/">https://arvr.google.com/experiences/learn/</a> | app software & free/paid                         | free/paid   | Android, IOS                             | <a href="https://play.google.com/store/apps/details?id=com.google.ar.blocks">https://play.g</a>   | <a href="https://itunes.apple.com/us/app/google-ar-blocks/id10604563">https://itunes.apple.com/us/app/google-ar-blocks/id10604563</a>           | Make AR & VR in the classroom                                                                                                                 |                                                 |  |
| 5                                                                               | Cospaceedu              |               | Desktop VR/VR/AR      | <a href="https://cospaces.io/">https://cospaces.io/</a>                                             | app website & free                               | free        | Android, IOS                             | <a href="https://play.google.com/store/apps/details?id=com.cospaceedu">https://play.g</a>         | <a href="https://itunes.apple.com/us/app/cospaceedu/id1131711062">https://itunes.apple.com/us/app/cospaceedu/id1131711062</a>                   |                                                                                                                                               |                                                 |  |
| 6                                                                               | Expeditions             | Google        | VR/AR                 | <a href="https://edu.google.com/experiments/vr/">https://edu.google.com/experiments/vr/</a>         | app website & free                               | free        | Android, IOS                             | <a href="https://play.google.com/store/apps/details?id=com.google.expeditions">https://play.g</a> | <a href="https://itunes.apple.com/us/app/expeditions/id1131711062">https://itunes.apple.com/us/app/expeditions/id1131711062</a>                 |                                                                                                                                               |                                                 |  |
| 7                                                                               | Kitely                  |               | Social VR/Desktop VR  | <a href="https://www.kitely.com/">https://www.kitely.com/</a>                                       | website free to use / paid to host (\$5 / month) | paid        | Windows, Mac                             |                                                                                                   |                                                                                                                                                 |                                                                                                                                               | Προσθήκη πλατφόρμας 3D Εικονικών κόσμων Opensim |  |
| 8                                                                               | MERGE Cube              |               |                       | <a href="https://mergecube.com/">https://mergecube.com/</a>                                         | software & free                                  | free        | studio/windows/ εφομνη/ app              | <a href="https://play.google.com/store/apps/details?id=com.mergecube">https://play.g</a>          | <a href="https://apps.apple.com/gr/app/megacube">https://apps.apple.com/gr/app/megacube</a>                                                     | Recommended for ages 13 and older, this Educators can use the tool to gamify learn                                                            |                                                 |  |
| 9                                                                               | Metaverse               |               | AR                    | <a href="https://studio.google.com/experiments/ar/">https://studio.google.com/experiments/ar/</a>   | Windows software & free                          | free        | Windows 10                               | <a href="https://play.google.com/store/apps/details?id=com.google.ar.studio">https://play.g</a>   | <a href="https://apps.apple.com/gr/app/metaverse">https://apps.apple.com/gr/app/metaverse</a>                                                   |                                                                                                                                               | Απατούνται headset                              |  |
| 10                                                                              | Microsoft Mixed Reality | Microsoft     | AR/MR                 | <a href="https://www.microsoft.com/mixedreality/">https://www.microsoft.com/mixedreality/</a>       | app software & free / FOSS                       | free / FOSS | Windows, Mac                             |                                                                                                   |                                                                                                                                                 |                                                                                                                                               |                                                 |  |
| 11                                                                              | OpenSimulator           |               | Desktop VR            | <a href="http://opensimulator.org/en/">http://opensimulator.org/en/</a>                             | software free                                    | free        | Windows, Mac                             |                                                                                                   |                                                                                                                                                 |                                                                                                                                               |                                                 |  |
| 12                                                                              | Paint 3D                | Microsoft     |                       | <a href="https://www.microsoft.com/windows/3d/">https://www.microsoft.com/windows/3d/</a>           | software free                                    | free        | Windows                                  |                                                                                                   |                                                                                                                                                 | <a href="https://www.flivis.net/learn/2019/04/09/fish-tank-%ce%b5%ce%bd%">https://www.flivis.net/learn/2019/04/09/fish-tank-%ce%b5%ce%bd%</a> |                                                 |  |
| 13                                                                              | Powerpoint              | Microsoft     | Digital story telling |                                                                                                     | software free                                    | paid        | Windows, Mac                             |                                                                                                   |                                                                                                                                                 |                                                                                                                                               |                                                 |  |
| 14                                                                              | Recroom                 |               | Social VR/Desktop VR  | <a href="https://rec.net/">https://rec.net/</a>                                                     | software & app free                              | free        | Windows, Mac, Oculus, Steam, IOS         |                                                                                                   | <a href="https://apps.apple.com/us/app/rec-room/id1450305065">https://apps.apple.com/us/app/rec-room/id1450305065</a>                           |                                                                                                                                               | με κώματα, ενσωμάτωση στο h5p                   |  |
| 15                                                                              | Samsung Gear 360        | Samsung       | VR/360                |                                                                                                     | app free                                         | free        | Android, IOS                             | <a href="https://play.google.com/store/apps/details?id=com.samsung.vr">https://play.g</a>         | <a href="https://apps.apple.com/us/app/samsung-gear-360-camera/id10604563">https://apps.apple.com/us/app/samsung-gear-360-camera/id10604563</a> |                                                                                                                                               |                                                 |  |
| 16                                                                              | Sansar                  | Linden Lab    | Social VR/Desktop VR  | <a href="https://www.sansar.com/">https://www.sansar.com/</a>                                       | software free                                    | free        | Windows, HTC, Oculus, Steam              |                                                                                                   |                                                                                                                                                 |                                                                                                                                               |                                                 |  |
| 17                                                                              | Second Life             | Linden Lab    | Desktop VR            | <a href="https://secondlife.com/">https://secondlife.com/</a>                                       | software free                                    | free        | Windows, Mac                             |                                                                                                   |                                                                                                                                                 | <a href="https://youtu.be/F147GuO1QI4">https://youtu.be/F147GuO1QI4</a>                                                                       |                                                 |  |
| 18                                                                              | Sketchfab               |               | 3d objects repository | <a href="https://sketchfab.com/">https://sketchfab.com/</a>                                         | website free                                     | free        | Windows, Mac                             |                                                                                                   |                                                                                                                                                 |                                                                                                                                               | δωρεάν 3d αντικείμενα                           |  |

**Figure S5.** Snapshot from Attachment 1.3 “Comparative Table of AR / VR Tools & Platforms”.

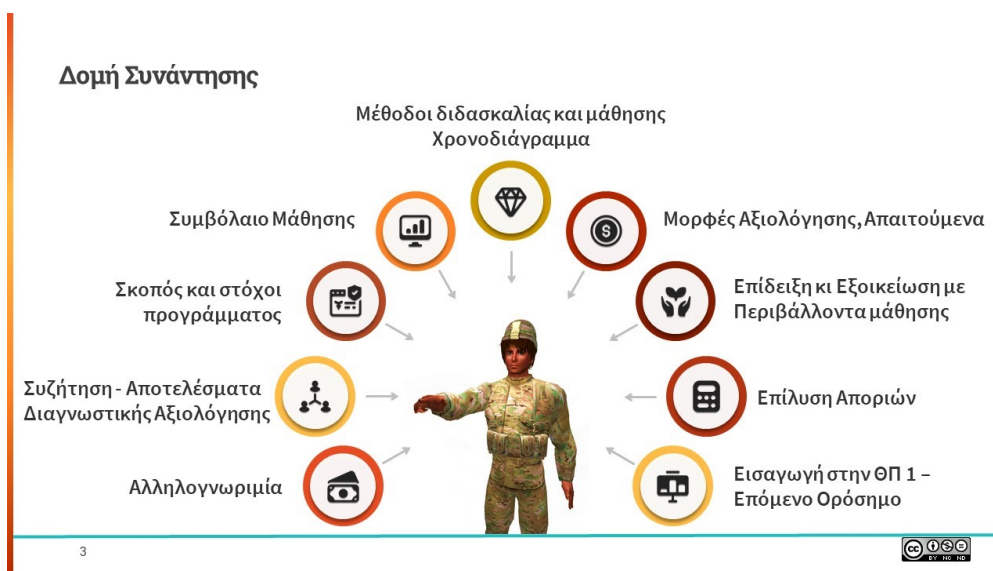

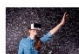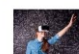

## 1. Προετοιμασία για τα Εργαστήρια (εγκατάσταση apps / software)

- Εγκαταστήστε τις εξής εφαρμογές (apps) στο κινητό ή tablet σας τις εξής εφαρμογές:

| Εφαρμογή                                                                          | Android                                                                                                                                                       | iOS                                                                                                                                             |
|-----------------------------------------------------------------------------------|---------------------------------------------------------------------------------------------------------------------------------------------------------------|-------------------------------------------------------------------------------------------------------------------------------------------------|
|  | <a href="https://play.google.com/store/apps/details?id=com.blippar.ar.android">https://play.google.com/store/apps/details?id=com.blippar.ar.android</a>       | <a href="https://apps.apple.com/us/app/blippar-the-ar-browser/id410604563">https://apps.apple.com/us/app/blippar-the-ar-browser/id410604563</a> |
|  | <a href="https://play.google.com/store/apps/details?id=com.google.vr.expeditions">https://play.google.com/store/apps/details?id=com.google.vr.expeditions</a> | <a href="https://apps.apple.com/us/app/expeditions/id1131711060">https://apps.apple.com/us/app/expeditions/id1131711060</a>                     |

- Δημιουργήστε έναν λογαριασμό στις εξής πλατφόρμες:

| Πλατφόρμα                                                                         | URL                                                                                       |
|-----------------------------------------------------------------------------------|-------------------------------------------------------------------------------------------|
|  | <a href="https://www.blippar.com/">https://www.blippar.com/</a>                           |
|  | <a href="https://arvr.google.com/tour-creator/">https://arvr.google.com/tour-creator/</a> |
|  | <a href="https://poly.google.com/">https://poly.google.com/</a>                           |

## 2. Βιώστε την AR στην Εκπαίδευση (Google Expeditions)

- Δείτε και δοκιμάστε τα παρακάτω:

- ⇒ Παρακολουθήστε ένα σχετικό Video με Google Expeditions AR: <https://youtu.be/-DYqlaMWTvg> για να φέρετε στη μνήμη σας τη συγκεκριμένη εφαρμογή.
- ⇒ Προσπαθήστε να εγκαταστήσετε στην κινητή σας συσκευή την εφαρμογή Google Expeditions.
- ⇒ Περιηγηθείτε μέσα σε αυτή και δοκιμάστε.
- ⇒ Συμβουλευθείτε τη βιντεοδιάλεξη 2.4 για τον τρόπο/τρόπους χρήσης, αξιοποίησης και εγκατάστασης της εφαρμογής Google Expeditions , καθώς και αυτή τη διεύθυνση [https://support.google.com/edu/expeditions/answer/6335098?hl=en&ref\\_topic=6334250](https://support.google.com/edu/expeditions/answer/6335098?hl=en&ref_topic=6334250)

## 3. Βιώστε Ψηφιακή Αφίληση με AR

- Δείτε και δοκιμάστε τα παρακάτω:

- ⇒ Αξιοποιήστε, ως εισαγωγή στην επαυξημένη πραγματικότητα, την εφαρμογή Quiver- <http://www.quivervision.com/>.
  - Εκτυπώστε τα ελεύθερα σχέδια που διαθέτει.
  - Ζυγωφάστε τα.
  - Εγκαταστήστε την συγκεκριμένη εφαρμογή σε μία κινητή συσκευή Android ή iOS.
  - Με την κινητή σας συσκευή, μέσω της εφαρμογής, σαρώστε το σχέδιο που εκτυπώσατε. Τι εμφανίζεται;
  - Δείτε ένα video: <https://www.youtube.com/watch?v=t8Ym53L79YU>

## 2. Η εφαρμογή με την οποία θα ασχοληθούμε είναι η Blippar.

- ⇒ Προσπαθήστε να κάνετε έναν λογαριασμό στο <https://www.blippar.com/>. Πρόκειται για ένα studio δημιουργίας επαυξημένης πραγματικότητας με σχετικά εύκολο τρόπο.
- ⇒ Περιηγηθείτε στο περιβάλλον της και στα εργαλεία της. Με ποιον τρόπο έχετε τη δυνατότητα να δημιουργήσετε blipps όπως ονομάζονται τα αρχεία της εφαρμογής;
- ⇒ Δείτε παρακάτω το 5. Με ποιον τρόπο μπορείτε να δημιουργήσετε AR με τη βοήθεια της εφαρμογής Blippar;
- ⇒ Παρακολουθήστε ένα Video: <https://www.youtube.com/watch?v=vuG-xBVyUUA>

Figure S7. Snapshot from Activity 2.4 “Augment your Teaching!” Instructions.



## Μικροεπίπεδο μαθησιακού σχεδιασμού

| Δεξιότητες                                           | Αναμενόμενα μαθησιακά αποτελέσματα                                         | Δραστηριότητες μαθητών                                                                                                            | Δραστηριότητες εκπαιδευτικού                                                                                       | Εργαλεία                                                                                                  | Διάταξη                                                                                           | Μαθησιακά προϊόντα για αξιολόγηση                                               |
|------------------------------------------------------|----------------------------------------------------------------------------|-----------------------------------------------------------------------------------------------------------------------------------|--------------------------------------------------------------------------------------------------------------------|-----------------------------------------------------------------------------------------------------------|---------------------------------------------------------------------------------------------------|---------------------------------------------------------------------------------|
| (Δεξιότητες που αναμένεται να αναπτύξουν οι μαθητές) | (Τα αναμενόμενα μαθησιακά αποτελέσματα – μαθησιακοί στόχοι του σχεδιασμού) | (Σύντομη αναφορά στις εργασίες (tasks) που αναμένεται να κάνει ο μαθητής για τη δραστηριότητα και ο εκτιμώμενος χρόνος εκτέλεσης) | (Σύντομη αναφορά στις εργασίες (tasks) που αναμένεται να κάνει ο εκπαιδευτικός για να υλοποιήσει τη δραστηριότητα) | (Εργαλεία (π.χ. τεχνολογίες, φύλλα εργασίας) που θα χρησιμοποιηθούν για την υλοποίηση της δραστηριότητας) | (Τρόπος διάταξης της τάξης και των μαθητών π.χ. ομάδες των 2, Εργαστήριο Η/Υ, ατομικά, ολομέλεια) | (Τι θα παράξει ο μαθητής ως αποτέλεσμα της δραστηριότητας ώστε να αξιολογηθεί;) |
|                                                      |                                                                            |                                                                                                                                   |                                                                                                                    |                                                                                                           |                                                                                                   |                                                                                 |
|                                                      |                                                                            |                                                                                                                                   |                                                                                                                    |                                                                                                           |                                                                                                   |                                                                                 |
|                                                      |                                                                            |                                                                                                                                   |                                                                                                                    |                                                                                                           |                                                                                                   |                                                                                 |

Επιμόρφωση Εκπαιδευτών για την Ανάπτυξη Ψηφιακής Ικανότητας – Μαθησιακή Ενότητα 5

5/10

Figure S8. Snapshot from Activity 4.3 “Class Application and Research Project” Template.

**A.3.ΕΚΠΑΙΔΕΥΟΜΕΝΟΙ/ΜΑΘΗΤΕΣ**

Δίνουμε πληροφορίες για τους μαθητές μας, που αφορούν στο αριθμό, την ηλικία τους, πιθανές ειδικές εκπαιδευτικές ανάγκες, ώστε να διαφοροποιήσουμε ανάλογα τη διδασκαλία μας.

**A.4.ΕΚΠΑΙΔΕΥΤΙΚΟ ΠΕΡΙΒΑΛΛΟΝ**

Αναφέρουμε το σχολείο και την τάξη για την οποία σχεδιάζουμε το σενάριο μας.

**A.5.ΕΚΤΙΜΩΜΕΝΗ ΔΙΑΡΚΕΙΑ**

Σημειώνουμε τον χρόνο που υπολογίζουμε πως θα απαιτηθεί για την ολοκλήρωση του εκπαιδευτικού σεναρίου. Ανάλογα με τις δραστηριότητες του σεναρίου, μπορεί να είναι από μια-δυο διδακτικές ώρες, μια διδακτική ημέρα ή και περισσότερο σε περίπτωση ενός μακροπρόθεσμου σχεδίου εργασίας (πρότζεκτ).

**B. ΟΡΓΑΝΩΣΗ ΔΙΔΑΣΚΑΛΙΑΣ**

**B. ΟΡΓΑΝΩΣΗ ΔΙΔΑΣΚΑΛΙΑΣ**

ΧΡΟΤΑΞΙΚΗ ΟΡΓΑΝΩΣΗ

ΑΠΑΙΤΟΥΜΕΝΗ ΥΛΙΚΟΤΕΧΝΙΚΗ ΥΠΟΔΟΜΗ

**B1. ΧΡΟΤΑΞΙΚΗ ΟΡΓΑΝΩΣΗ**

Αρχικά, **περιγράφουμε** τον τρόπο που διενθετούμε το χώρο της τάξης μας για να υπηρετήσει τις ανάγκες της διδασκαλίας μας. (π.χ. διευθέτηση θρανίων, πόσοι μαθητές ανά ΗΥ, κλπ.)

**B2. ΑΠΑΙΤΟΥΜΕΝΗ ΥΛΙΚΟΤΕΧΝΙΚΗ ΥΠΟΔΟΜΗ**

Στη συνέχεια, **καταγράφουμε** το υπολογιστικό περιβάλλον που θα **αξιοποιήσουμε** ( π.χ. Tour Creator) καθώς και την απαιτούμενη υλικοτεχνική **υποδομή** που θα πρέπει να έχουμε στο σχολείο μας (π.χ. Google Expeditions, tablets, συσκευές συμβατές, κτλ). Σημαντικό στοιχείο είναι να αναφέρουμε το γιατί χρησιμοποιούμε αυτό το τεχνολογικό περιβάλλον σε σχέση με το τι θα προσδώσει στο εκπαιδευτικό μας σενάριο.

**Γ. ΠΑΙΔΑΓΩΓΙΚΟ ΠΛΑΙΣΙΟ**

**Γ. ΠΑΙΔΑΓΩΓΙΚΟ ΠΛΑΙΣΙΟ**

Γ1. ΓΝΩΣΤΙΚΟ ΑΝΤΙΚΕΙΜΕΝΟ ΔΙΔΑΣΚΑΛΙΑΣ-ΘΕΜΑΤΙΚΗ ΕΝΟΤΗΤΑ

Γ2. ΔΙΔΑΚΤΙΚΟΙ ΣΤΟΧΟΙ-ΠΡΟΣΔΟΚΩΜΕΝΑ ΑΠΟΤΕΛΕΣΜΑΤΑ

Γ3. ΠΡΟΔΙΑΓΡΑΜΜΕΝΕΣ ΓΝΩΣΕΙΣ

Γ4. ΠΑΙΔΑΓΩΓΙΚΗ ΠΡΟΣΕΓΓΙΗ

Γ5. ΜΕΘΟΔΟΛΟΓΙΚΗ ΠΡΟΣΕΓΓΙΗ

**Γ1. ΓΝΩΣΤΙΚΟ ΑΝΤΙΚΕΙΜΕΝΟ ΔΙΔΑΣΚΑΛΙΑΣ-ΘΕΜΑΤΙΚΗ ΕΝΟΤΗΤΑ**

Σημειώνουμε τα γνωστικά αντικείμενα με τα οποία σχετίζεται το σενάριο. (Π.χ. Περιβαλλοντική Εκπαίδευση- «Ανακύκλωση»)

**Γ2. ΔΙΔΑΚΤΙΚΟΙ ΣΤΟΧΟΙ-ΠΡΟΣΔΟΚΩΜΕΝΑ ΑΠΟΤΕΛΕΣΜΑΤΑ**

Figure S9. Snapshot from Attachment 4.1 “Inquiry-based Learning Scenario with VR environments Instructions”.



## "Επαυξημένη και Εικονική Πραγματικότητα στη Διδασκαλία και τη Μαθηση"

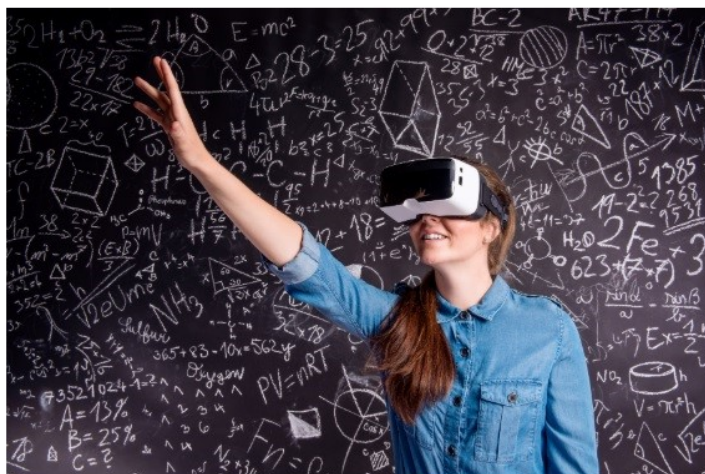

### Συντελεστές

Δρ. Φραγκάκη Μαρία, Επιστημονική Υπεύθυνη Ομάδας

Δρ. Μυστακίδης Στυλιανός, Βασικός Εμπειρογνώμονας - Συντονιστής Συγγραφικής Ομάδας

Δρ. Φιλιππούσης Γεώργιος, Εμπειρογνώμονας Ομάδας

### Γενικές Πληροφορίες

-  Σύντομη Περιγραφή Ενότητας
-  Οδηγός Μελέτης Ενότητας (μορφή PDF)
-  Σκοπός & Στόχοι της Μαθησιακής Ενότητας
-  Ανακοινώσεις
-  Forum Συζήτησης

Figure S10. Snapshot from the asynchronous learning environment in the Moodle Learning Management System.
